# Supplementary material for: Identification of TGFβ signaling as a regulator of interneuron neurogenesis in a human pluripotent stem cell model
Source: Oxford University Press journal article supplement (doi:10.1042/ns20210020), 2021-11-11
Supplement: ns-2021-0020_supp.pdf [file ns-2021-0020_supp.pdf]

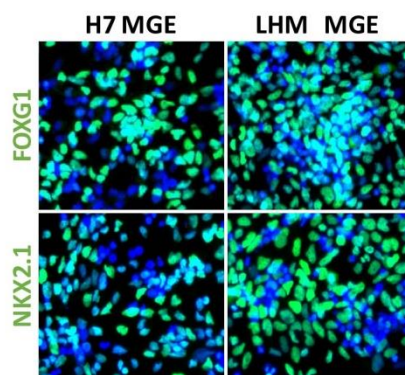

**Fig S1. MGE induction of hESCs**

Day 21 LHM differentiation cultures were immunostained for neural progenitor markers representing pan-forebrain (FOXG1) and MGE (NKX2.1) with DAPI counter stain (Blue). The panels shown are higher magnification of figure 1C.

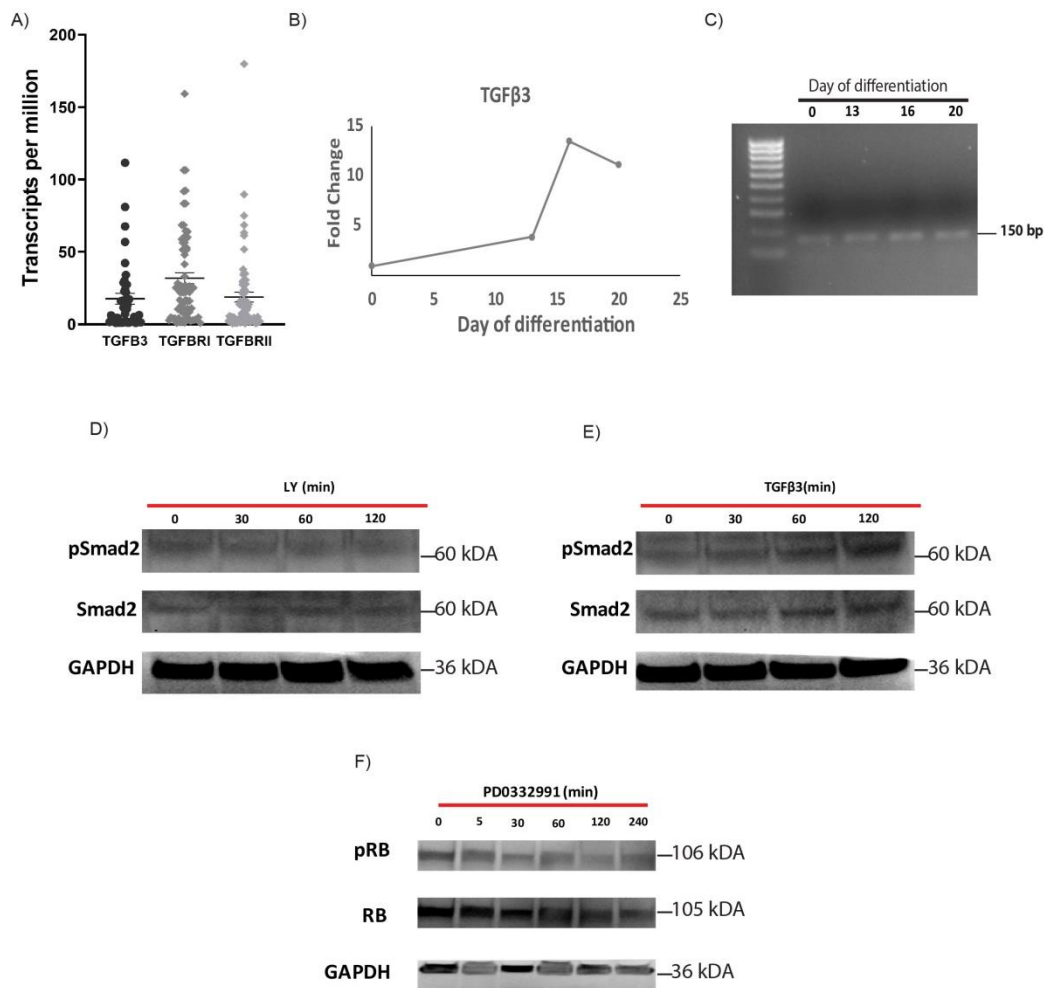

**Figure S2. Validation of biological activity of TGFβ3, TGFβ inhibitor LY2109761 and CDK4/6 inhibitor PD0332991**

A, Single cell RNAseq data showing the transcript levels of TGFβ3, TGFβRI and TGFβRII in a single hESC-derived MGE cells. n=42, 70 and 67, respectively; TPM: transcript per million.

B, qPCR analysis for TGFβ3 at day 13, 16 and 20 and shows its upregulation relative to undifferentiated hESCs at day 0;

C, Agarose gel electrophoresis showing the final 150bp qPCR product;

D, hESC-derived MGE cells were exposed to LY2109761 for the time indicated and processed for Western blot analysis for total Smad2 and phospho-Smad2;

E, Western blot analysis of TGFβ3 treated cells for total and phospho-Smad2;

F, Western blot analysis for total and phosphorylated RB protein on cells treated with the CDK4/6 inhibitor PD0332991.

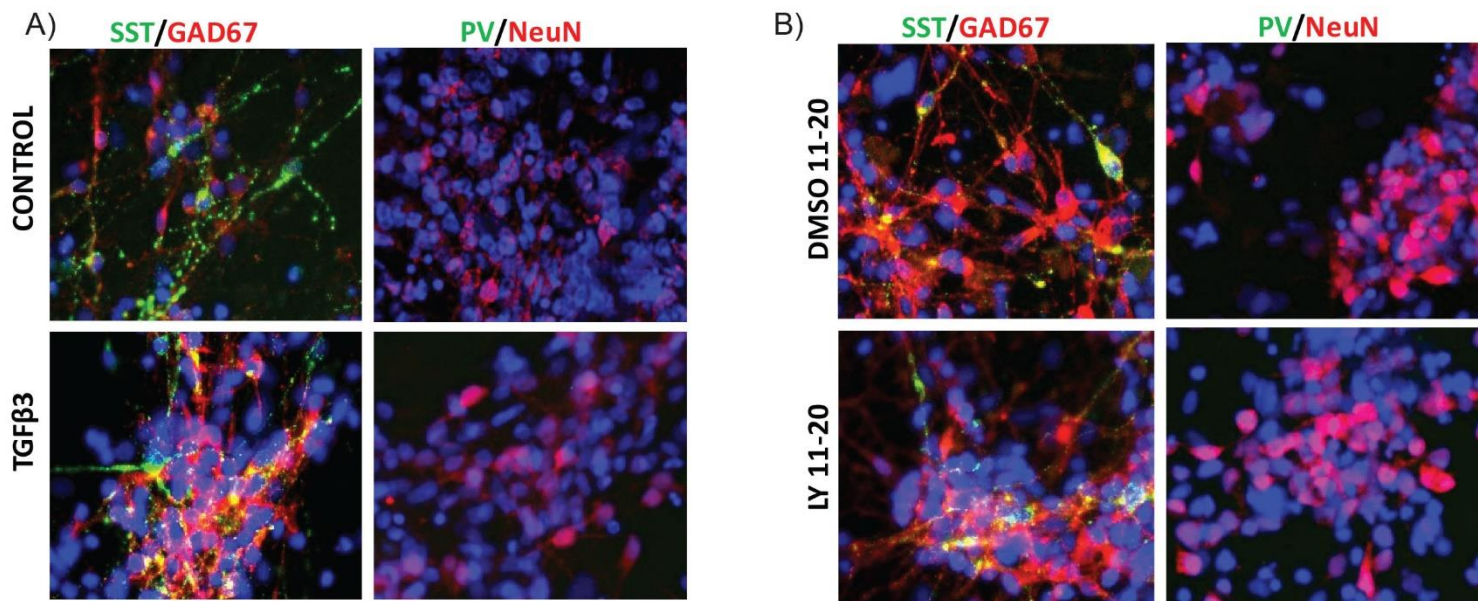

**Figure S3, Higher magnification images**

A, Digital magnification of Figure 2E,

B, Digital magnification of Figure 3F.

A)

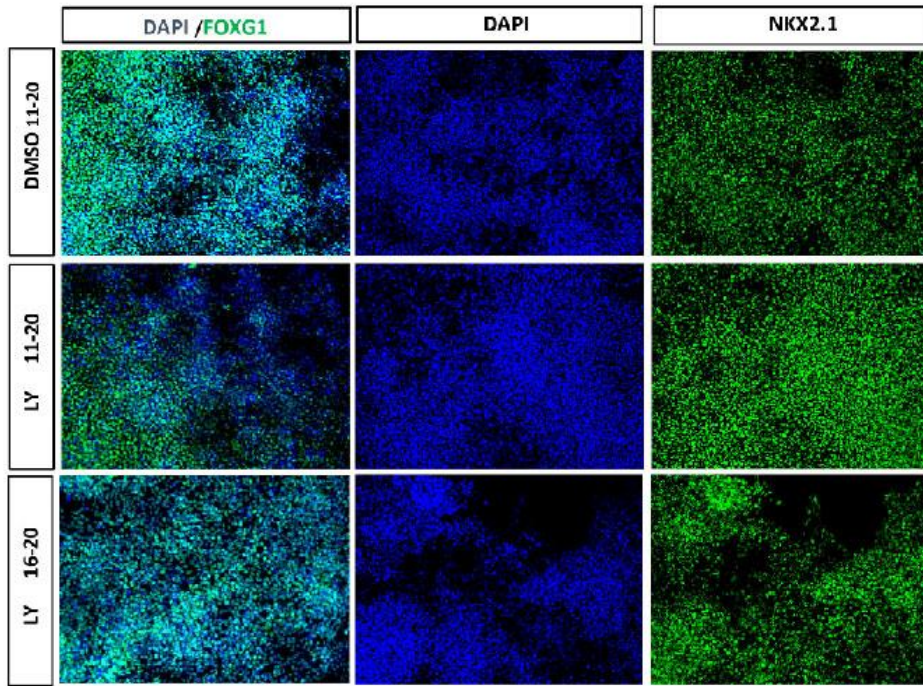

B)

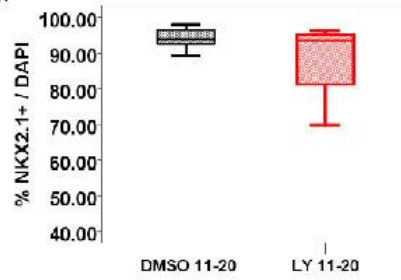

C)

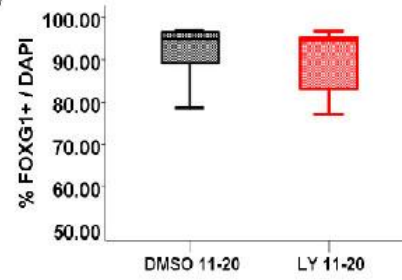

D)

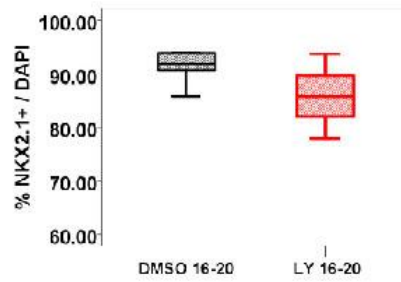

E)

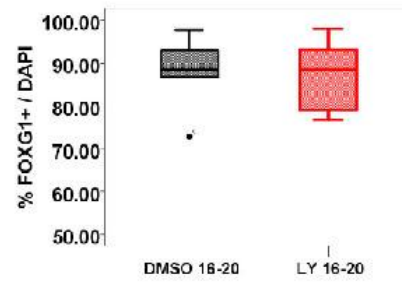

**Fig S4, TGF $\beta$  inhibition doesn't affect MGE-progenitor production**

A, Representative immunocytochemistry for NKX2.1 and FOXP1 in H7 parental line. B-E, Quantitative data of the marker-expressing cells in LY treated conditions and respective DMSO controls.

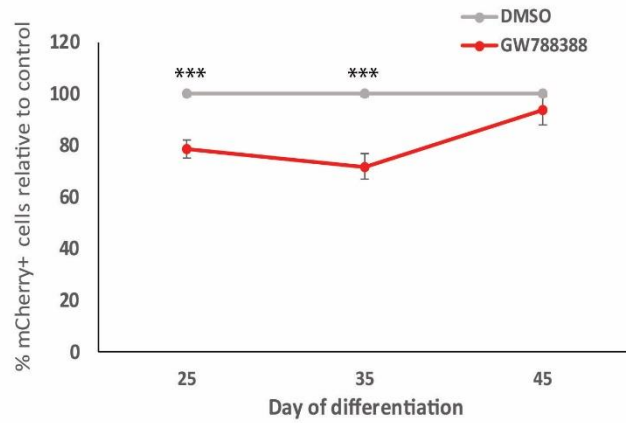

**Figure S5. Effects of TGF $\beta$  inhibitor GW788388 on mCherry<sup>+</sup> cell production**  
Day 25 and day 35 flow cytometry profile of mCherry<sup>+</sup> cells of cultures treated with or without GW788388. Shown are GW788388 relative to control values where the lateral was set as 100%. \*\*\* P<0.001, univariate analysis post-hoc Bonferroni.

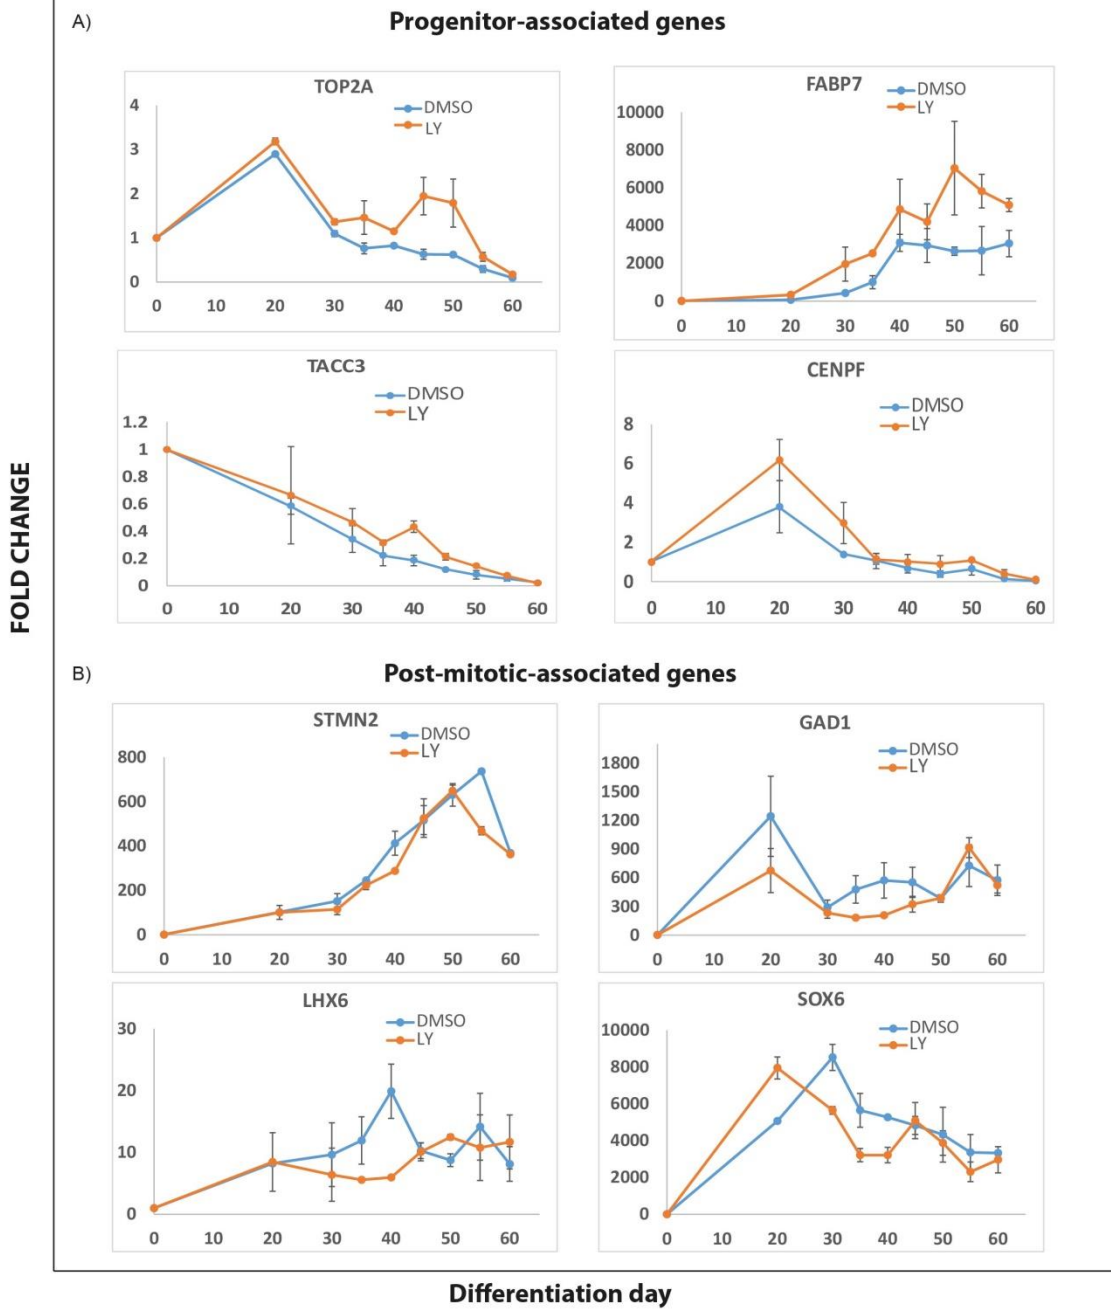

**Fig S6, Effect of TGF $\beta$  inhibition on expression of genes associated with MGE progenitors and post-mitotic neurons.**

A) Expression profile in LHM cells of MGE-progenitors associated genes (*TOP2*, *FABP7*, *TACC3* and *CENPF*) in control (blue) and LY-treated cultures (orange). B) Expression profile in LHM cells of genes associated to post-mitotic MGE derivatives (*STMN2*, *GAD1*, *LHX6* and *SOX6*) in control (blue) and LY-treated cultures (orange). Data is presented as the mean fold change  $\pm$  SEM from triplicates of two independent experiments.



**Table S1** Antibodies used for immunocytochemistry

| <b>Antigen</b> | <b>Species</b> | <b>Supplier</b> | <b>Code</b> | <b>Dilution</b> |
|----------------|----------------|-----------------|-------------|-----------------|
| CALRETININ     | Rabbit         | Swant           | CR 7697     | 1:500           |
| CTIP2          | Rat            | Abcam           | Ab18465     | 1:500           |
| FOXP1          | Rabbit         | Abcam           | ab18259     | 1:250           |
| GAD67          | Mouse          | Millipore       | mab5406     | 1:500           |
| LHX6           | Rabbit         | Santa cruz      | sc98607     | 1:500           |
| mCherry        | CHICKEN        | ABCAM           | ab205402    | 1:500           |
| NeuN           | RABBIT         | MILLIPORE       |             | 1:500           |
| NKX2.1         | Rabbit         | Abcam           | Ab76013     | 1:1000          |
| OCT4           | Goat           | Santa cruz      | Sc8628      | 1:500           |
| OLIG2          | Goat           | R&D systems     | AF2418      | 1:200           |
| PAX6           | Mouse          | DSHB            |             | 1:1000          |
| PARVALBUMIN    | Mouse          | Sigma           | P3088       | 1:100           |
| SOMATOSTATIN   | Rat            | Millipore       | MAB354      | 1:50            |
| TBR1           | Rabbit         | Abcam           | ab31940     | 1:500           |
